# Supplementary material
Source: publisher figshare collection journal article supplement (https://asha.figshare.com/articles/dataset/_/6170201)
Supplement: Supplementary file 1 [file 1]

## Online Supplemental Material

### Experimental Stimuli: Treatment/Acquisition Stimuli

#### Participant 1

| <b>List 1</b><br><i>Rep./Rhythm<br/>Treatment #1</i> | <b>List 2</b><br><i>Rep. Treatment<br/>Only</i> | <b>List 3</b><br><i>Rep./Rhythm<br/>Treatment #2</i> | <b>List 4</b><br><i>Exposure<br/>No Treatment</i> | <b>List 5</b><br><i>Pre-Post<br/>No Treatment</i> |
|------------------------------------------------------|-------------------------------------------------|------------------------------------------------------|---------------------------------------------------|---------------------------------------------------|
| <u>f</u> reeze                                       | <u>f</u> lirt                                   | <u>g</u> leam                                        | <u>c</u> rop                                      | <u>t</u> rim                                      |
| <u>f</u> resh                                        | <u>f</u> laws                                   | <u>g</u> love                                        | <u>c</u> rown                                     | <u>t</u> rap                                      |
| <u>f</u> rail                                        | <u>f</u> lame                                   | <u>g</u> lad                                         | <u>c</u> reep                                     | <u>t</u> ruck                                     |
| <u>f</u> righ <u>t</u>                               | <u>f</u> loat                                   | <u>g</u> lare                                        | <u>c</u> rash                                     | <u>t</u> rail                                     |
| <u>f</u> ruit                                        | <u>f</u> lush                                   | <u>g</u> lass                                        | <u>c</u> roak                                     | <u>t</u> ROUT                                     |
| <u>p</u> rove                                        | <u>p</u> lume                                   | <u>s</u> lash                                        | <u>g</u> rave                                     | <u>t</u> hrive                                    |
| <u>p</u> rice                                        | <u>p</u> lot                                    | <u>s</u> leet                                        | <u>g</u> reen                                     | <u>t</u> hrush                                    |
| <u>p</u> rop                                         | <u>p</u> lane                                   | <u>s</u> lurp                                        | <u>g</u> rass                                     | <u>t</u> hrill                                    |
| <u>p</u> raise                                       | <u>p</u> lush                                   | <u>s</u> leuth                                       | <u>g</u> rip                                      | <u>t</u> hroat                                    |
| <u>p</u> rick                                        | <u>p</u> laque                                  | <u>s</u> lice                                        | <u>g</u> roup                                     | <u>t</u> hrong                                    |
| <u>s</u> cream                                       | <u>s</u> quid                                   | <u>s</u> plash                                       | <u>s</u> prain                                    | <u>s</u> tring                                    |
| <u>s</u> crape                                       | <u>s</u> quat                                   | <u>s</u> plurge                                      | <u>s</u> prout                                    | <u>s</u> treak                                    |
| <u>s</u> crub                                        | <u>s</u> queak                                  | <u>s</u> plit                                        | <u>s</u> pring                                    | <u>s</u> traight                                  |
| <u>s</u> cratch                                      | <u>s</u> quash                                  | <u>s</u> plotch                                      | <u>s</u> pruce                                    | <u>s</u> troll                                    |
| <u>s</u> croll                                       | <u>s</u> quare                                  | <u>s</u> plice                                       | <u>s</u> pread                                    | <u>s</u> tripe                                    |
| my <u>t</u> hic                                      | in <u>j</u> ure                                 | han <u>g</u> er                                      | backlog                                           | bas <u>i</u> c                                    |
| fil <u>t</u> hy                                      | fid <u>g</u> et                                 | king <u>d</u> om                                     | nutmeg                                            | lila <u>c</u>                                     |
| pith <u>y</u>                                        | led <u>g</u> er                                 | spring <u>y</u>                                      | bulldog                                           | hammo <u>c</u> k                                  |
| auth <u>o</u> r                                      | wag <u>e</u> r                                  | ring <u>e</u> r                                      | earwig                                            | civic                                             |
| eth <u>e</u> r                                       | sold <u>i</u> er                                | ting <u>e</u>                                        | iceberg                                           | attic                                             |

**Participant 2**

| <b>List 1</b><br><i>Rep./Rhythm<br/>Treatment 1<br/>(no rhythm<br/>treatment<br/>needed)</i> | <b>List 2</b><br><i>Rep. Treatment<br/>Only</i> | <b>List 3</b><br><i>Rep./Rhythm<br/>Tx. #2</i> | <b>List 4</b><br><i>Exposure<br/>No Treatment</i> | <b>List 5</b><br><i>Pre-Post<br/>No Treatment</i> |
|----------------------------------------------------------------------------------------------|-------------------------------------------------|------------------------------------------------|---------------------------------------------------|---------------------------------------------------|
| travesty                                                                                     | stipulate                                       | ablation                                       | abrasion                                          | thrombosis                                        |
| triplicate                                                                                   | statistic                                       | acquittal                                      | aquatic                                           | threatening                                       |
| transcription                                                                                | stupendous                                      | astonish                                       | acrylic                                           | thriftness                                        |
| tragedy                                                                                      | staccato                                        | aggressive                                     | aggregate                                         | thrillingly                                       |
| translucent                                                                                  | stiletto                                        | acquaintance                                   | acquiesce                                         | throwaway                                         |
| granola                                                                                      | schematic                                       | ambrosia                                       | iguana                                            | frequently                                        |
| gravitate                                                                                    | scavenger                                       | astringent                                     | inclusion                                         | frivolous                                         |
| graduate                                                                                     | skeptical                                       | arrangement                                    | establish                                         | fraudulent                                        |
| gradual                                                                                      | scandalous                                      | astronaut                                      | employee                                          | fraternal                                         |
| gridiron                                                                                     | scapula                                         | olympic                                        | entreaty                                          | fruition                                          |
| cranium                                                                                      | sporadic                                        | equation                                       | flamingo                                          | abrogate                                          |
| crystallize                                                                                  | specialize                                      | embroider                                      | fluorescent                                       | amethyst                                          |
| crustacean                                                                                   | spatula                                         | eclectic                                       | fluctuate                                         | electric                                          |
| crescendo                                                                                    | specific                                        | espresso                                       | flirtatious                                       | eloquent                                          |
| critical                                                                                     | spectacle                                       | excretion                                      | flatulent                                         | aggravate                                         |
| dramatic                                                                                     | smattering                                      | execute                                        | placebo                                           | anthracite                                        |
| drapery                                                                                      | smithereens                                     | estrogen                                       | plagiarize                                        | introduce                                         |
| drowsiness                                                                                   | smorgasbord                                     | instrument                                     | platonic                                          | undulate                                          |
| drudgery                                                                                     | smoldering                                      | institute                                      | plausible                                         | ostracize                                         |
| drearily                                                                                     | smilingly                                       | integrate                                      | plethora                                          | apprentice                                        |

### Participant 3

| <b>List 1</b><br><i>Rep./Rhythm<br/>Treatment 1<br/>(no rhythm<br/>treatment<br/>needed)</i> | <b>List 2</b><br><i>Rep. Treatment<br/>Only</i> | <b>List 3</b><br><i>Rep./Rhythm<br/>Treatment #2<br/>(no rhythm<br/>treatment<br/>needed)</i> | <b>List 4</b><br><i>Exposure<br/>No Treatment</i> | <b>List 5</b><br><i>Pre-Post<br/>No Treatment</i> |
|----------------------------------------------------------------------------------------------|-------------------------------------------------|-----------------------------------------------------------------------------------------------|---------------------------------------------------|---------------------------------------------------|
| strangulate                                                                                  | squandering                                     | scratchiness                                                                                  | splendorous                                       | spreadeagle                                       |
| strategic                                                                                    | squaredances                                    | screenwriter                                                                                  | splattering                                       | springiness                                       |
| Stravinsky                                                                                   | squiggling                                      | screwdriver                                                                                   | splintering                                       | sprightliness                                     |
| strategize                                                                                   | squeamishness                                   | scriptural                                                                                    | splotchiness                                      | sclerosis                                         |
| stratosphere                                                                                 | squishiness                                     | scrupulous                                                                                    | splutterer                                        | sclerotic                                         |
| stringent                                                                                    | squeegee                                        | scrumptious                                                                                   | splashes                                          | sprucest                                          |
| structure                                                                                    | squalor                                         | scrimmage                                                                                     | splitshift                                        | sclera                                            |
| stretcher                                                                                    | squishy                                         | screeches                                                                                     | splinter                                          | sprinkler                                         |
| streusel                                                                                     | squirmy                                         | scrawny                                                                                       | splendid                                          | sprayer                                           |
| strangle                                                                                     | squadron                                        | scrabble                                                                                      | splashboard                                       | sprawling                                         |
| achievement                                                                                  | ungracious                                      | egregious                                                                                     | angrily                                           | equation                                          |
| actual                                                                                       | ablation                                        | astrigent                                                                                     | Anglicize                                         | ambrosia                                          |
| amateur                                                                                      | excretion                                       | angina                                                                                        | angular                                           | abrasion                                          |
| anchovy                                                                                      | absorption                                      | estrogen                                                                                      | Englishmen                                        | inclusion                                         |
| essential                                                                                    | official                                        | undulate                                                                                      | inglenook                                         | aversion                                          |
| patchouli                                                                                    | crustacean                                      | drudgery                                                                                      | lingering                                         | treasury                                          |
| hatchery                                                                                     | crescendo                                       | vigilant                                                                                      | sanguinely                                        | measurement                                       |
| kitchenette                                                                                  | sashimi                                         | vegetable                                                                                     | congregate                                        | luxury                                            |
| flatulence                                                                                   | fruition                                        | scheduling                                                                                    | fungicide                                         | visual                                            |
| petulant                                                                                     | tenacious                                       | legible                                                                                       | bungalow                                          | casual                                            |

## Participant 4

| <b>List 1</b><br><i>Rep./Rhythm<br/>Treatment 1</i>                   | <b>List 2</b><br><i>Rep. Treatment<br/>1</i>                          | <b>List 3</b><br><i>Exposure &amp;<br/>Rep. Treatment<br/>2</i>        | <b>List 4</b><br><i>Rep./Rhythm<br/>Treatment 2</i>                           | <b>List 5</b><br><i>Pre-Post<br/>No Treatment</i>                    |
|-----------------------------------------------------------------------|-----------------------------------------------------------------------|------------------------------------------------------------------------|-------------------------------------------------------------------------------|----------------------------------------------------------------------|
| <u>Yolanda</u> knitted <u>yellow leggings</u> .                       | <u>Theo</u> <u>found</u> a <u>fun</u> <u>theology</u> course          | <u>Jerry</u> took a <u>jitney</u> in <u>Jakarta</u> .                  | The <u>gardener</u> <u>watered</u> the <u>arugula</u> .                       | <u>Zoe</u> <u>saw</u> a <u>sinister</u> <u>psychic</u> .             |
| <u>Your uvula</u> is <u>unusual</u> .                                 | <u>Thelma</u> <u>fabricated</u> a <u>thermos</u> .                    | The <u>chipmunk</u> <u>chewed</u> a <u>chickory</u> <u>chip</u> .      | The <u>aquarium</u> <u>required</u> <u>water</u> .                            | <u>Susan</u> <u>snored</u> taking a <u>siesta</u> .                  |
| <u>Leo</u> usually <u>likes</u> <u>lemonade</u>                       | The <u>thrifty</u> <u>federal</u> <u>officer</u> <u>failed</u>        | <u>Janet</u> was a <u>champion</u> <u>juggler</u> .                    | The <u>realtor</u> <u>rented</u> the <u>apartment</u> .                       | <u>Seven</u> <u>Persons</u> took a <u>sabbatical</u> .               |
| <u>Yanni</u> <u>plays</u> a <u>little</u> <u>ukulele</u> .            | <u>Thor</u> <u>fainted</u> on his <u>thirtieth</u> <u>birthday</u> .  | <u>Chad</u> and <u>Janie</u> have <u>cherubic</u> <u>smiles</u> .      | The <u>ranger</u> <u>walked</u> <u>through</u> <u>bear</u> <u>territory</u> . | <u>Stacie</u> and <u>Sam's</u> <u>dance</u> was <u>sensational</u> . |
| <u>Yogi</u> <u>liked</u> the <u>pastor's</u> <u>eulogy</u> .          | <u>Fred</u> had a <u>faulty</u> <u>thoracic</u> <u>duct</u> .         | <u>John</u> <u>genetically</u> <u>engineered</u> <u>chimps</u> .       | The <u>racketeer</u> <u>resisted</u> <u>arrest</u> .                          | The <u>states</u> will <u>utilize</u> the <u>census</u> .            |
| <u>Lilly</u> <u>practiced</u> <u>yoga</u> <u>yesterday</u> .          | <u>Fatima</u> has a <u>familiar</u> <u>face</u> .                     | <u>Chet</u> ate <u>gingerbread</u> in the <u>kitchen</u> .             | The <u>radio</u> will <u>reverberate</u> .                                    | <u>Sampson</u> was <u>sadistic</u> to <u>Zachary</u> .               |
| I want a <u>lapis</u> <u>lazuli</u> <u>necklace</u> .                 | <u>Fanny</u> had her <u>fiftieth</u> <u>first</u> <u>date</u> .       | <u>Charles</u> is not of <u>German</u> <u>origin</u> .                 | <u>Remember</u> to <u>bring</u> the <u>recorder</u> .                         | I <u>assume</u> his <u>cynicism</u> is <u>false</u> .                |
| <u>Young</u> <u>ladies</u> <u>looked</u> <u>longingly</u> at him.     | The <u>thief</u> was a <u>fanatical</u> <u>fiend</u> .                | <u>Chip</u> bought <u>generic</u> <u>cherry</u> <u>chutney</u> .       | <u>Robert</u> <u>wore</u> <u>regular</u> <u>rubber</u> <u>boots</u> .         | <u>Sebastian's</u> <u>poise</u> <u>saved</u> his <u>sanity</u> .     |
| <u>Human</u> <u>albumin</u> is <u>used</u> by doctors.                | <u>Frida's</u> <u>father</u> <u>fixed</u> the <u>thermograph</u> .    | <u>Badgers</u> and <u>jackals</u> are <u>naturally</u> <u>mean</u> .   | <u>Roger</u> had a <u>rigorous</u> <u>workout</u> .                           | <u>Suzanna's</u> <u>zipper</u> was really <u>stuck</u> .             |
| <u>Leslie</u> <u>lives</u> in a <u>bucolic</u> <u>glade</u> .         | <u>Fatigue</u> caused the <u>fifth</u> <u>fatality</u> .              | <u>Jim</u> took <u>geology</u> in <u>July</u> .                        | The <u>wolverine</u> <u>ran</u> <u>through</u> the <u>wilderness</u> .        | <u>Summer</u> is a <u>sunshiny</u> <u>season</u> .                   |
| <u>Lee</u> <u>longs</u> to <u>emulate</u> <u>Abe</u> <u>Lincoln</u> . | <u>Theodore</u> is a <u>thoughtful</u> <u>brother</u> .               | <u>Julie</u> likes <u>geriatric</u> <u>research</u> .                  | <u>Roberta</u> <u>ripped</u> her <u>old</u> <u>underwear</u> .                | <u>Sylvester's</u> <u>sentence</u> was <u>excessive</u> .            |
| <u>Lilith</u> has a <u>glandular</u> <u>problem</u> .                 | <u>Thirty-three</u> <u>degrees</u> <u>Fahrenheit</u> is <u>cool</u> . | <u>Jessica</u> <u>watched</u> the <u>cheetahs</u> and <u>jaguars</u> . | The <u>wizard</u> <u>wore</u> an <u>aquamarine</u> <u>ring</u> .              | <u>Spencer</u> is <u>sadly</u> <u>pessimistic</u> .                  |

*Notes: Only underlined words were scored. Printed stimuli used along with verbal model.*

## Participant 5

| <b>List 1</b><br><i>Rep./Rhythm<br/>Treatment 1</i> | <b>List 2</b><br><i>Rep. Treatment<br/>Only</i> | <b>List 3</b><br><i>Rep./Rhythm<br/>Treatment #2<br/>(no rhythm<br/>treatment<br/>needed)</i> | <b>List 4</b><br><i>Exposure &amp;<br/>Rep. Treatment<br/>2</i> | <b>List 5</b><br><i>Pre-Post<br/>No Treatment</i> |
|-----------------------------------------------------|-------------------------------------------------|-----------------------------------------------------------------------------------------------|-----------------------------------------------------------------|---------------------------------------------------|
| loathed                                             | prove                                           | freeze                                                                                        | thrive                                                          | trim                                              |
| scathed                                             | price                                           | fresh                                                                                         | thrush                                                          | trap                                              |
| swathed                                             | prop                                            | frail                                                                                         | thrill                                                          | truck                                             |
| writhed                                             | praise                                          | fright                                                                                        | throat                                                          | trail                                             |
| teethed                                             | prick                                           | fruit                                                                                         | throng                                                          | trout                                             |
| lords                                               | grab                                            | scream                                                                                        | string                                                          | sprain                                            |
| wards                                               | groom                                           | scrape                                                                                        | streak                                                          | sprout                                            |
| chords                                              | grape                                           | scrub                                                                                         | straight                                                        | spring                                            |
| gourds                                              | grief                                           | scratch                                                                                       | stroll                                                          | spruce                                            |
| hoards                                              | groan                                           | scroll                                                                                        | stripe                                                          | spread                                            |
| zombie                                              | beneath                                         | refuse                                                                                        | vocal                                                           | neighbor                                          |
| zipper                                              | mammoth                                         | rebel                                                                                         | rival                                                           | cedar                                             |
| xenon                                               | Kenneth                                         | rabbit                                                                                        | legal                                                           | liar                                              |
| zenith                                              | sabbath                                         | raccoon                                                                                       | fable                                                           | tiller                                            |
| zero                                                | duluth                                          | river                                                                                         | muscle                                                          | powder                                            |
| cobbler                                             | injure                                          | mythic                                                                                        | churches                                                        | bleacher                                          |
| glibly                                              | wager                                           | filthy                                                                                        | virtue                                                          | teacher                                           |
| goblin                                              | fidget                                          | pithy                                                                                         | kerchief                                                        | stature                                           |
| problem                                             | soldier                                         | author                                                                                        | purchased                                                       | nature                                            |
| public                                              | ledger                                          | ether                                                                                         | merchant                                                        | watcher                                           |

## Participant 6

| <b>List 1</b><br><i>Rep./Rhythm<br/>Treatment #1</i> | <b>List 2</b><br><i>Rep. Treatment<br/>Only</i> | <b>List 3</b><br><i>No Treatment<br/>#2</i> | <b>List 4</b><br><i>Exposure<br/>No Treatment</i> | <b>List 5</b><br><i>Pre-Post<br/>No Treatment</i> |
|------------------------------------------------------|-------------------------------------------------|---------------------------------------------|---------------------------------------------------|---------------------------------------------------|
| flexible                                             | stethoscope                                     | scandalous                                  | clairvoyant                                       | tragedy                                           |
| flatulent                                            | standardize                                     | scavenger                                   | clamorous                                         | transitive                                        |
| flagellate                                           | staggering                                      | scurrilous                                  | clandestine                                       | transparent                                       |
| flamboyant                                           | stadium                                         | scarcity                                    | clarify                                           | treasury                                          |
| Florida                                              | stupefy                                         | schematic                                   | clarinet                                          | tribunal                                          |
| flirtatious                                          | statistic                                       | skeleton                                    | classify                                          | triangle                                          |
| flotation                                            | stupendous                                      | scholarly                                   | clinical                                          | trickery                                          |
| flammable                                            | stiletto                                        | scallywag                                   | clavicle                                          | tryptophan                                        |
| flowering                                            | stagnation                                      | scorpion                                    | clemency                                          | tropical                                          |
| flavorful                                            | staccato                                        | skeptical                                   | clientele                                         | trumpeter                                         |
| remove                                               | beneath                                         | detach                                      | forage                                            | disease                                           |
| massive                                              | mammoth                                         | attach                                      | luggage                                           | knickers                                          |
| forgive                                              | Sabbath                                         | enrich                                      | cabbage                                           | appease                                           |
| behave                                               | Zenith                                          | bewitch                                     | baggage                                           | amaze                                             |
| relieve                                              | uncouth                                         | retouch                                     | sewage                                            | oppose                                            |
| alive                                                | Vermouth                                        | rematch                                     | message                                           | demise                                            |
| olive                                                | Kenneth                                         | unlatch                                     | damage                                            | baptize                                           |
| behoove                                              | Dartmouth                                       | dispatch                                    | rummage                                           | arouse                                            |
| archive                                              | rebirth                                         | Norwich                                     | porridge                                          | canoes                                            |
| concave                                              | forsooth                                        | research                                    | bandage                                           | lashes                                            |

## Participant 7

| <b>List 1</b><br><i>Rep./Rhythm<br/>Treatment #1</i> | <b>List 2</b><br><i>Rep. Treatment<br/>Only</i> | <b>List 3</b><br><i>Rep./Rhythm<br/>Treatment #2</i> | <b>List 4</b><br><i>Exposure &amp;<br/>Rep. Treatment<br/>2</i> | <b>List 5</b><br><i>Pre-Post<br/>No Treatment</i> |
|------------------------------------------------------|-------------------------------------------------|------------------------------------------------------|-----------------------------------------------------------------|---------------------------------------------------|
| flexible                                             | stethoscope                                     | scandalous                                           | clairvoyant                                                     | tragedy                                           |
| flatulent                                            | standardize                                     | scavenger                                            | clamorous                                                       | transitive                                        |
| flagellate                                           | staggering                                      | scurilous                                            | clandestine                                                     | transparent                                       |
| flamboyant                                           | stadium                                         | scarcity                                             | clarify                                                         | treasury                                          |
| Florida                                              | stupefy                                         | schematic                                            | clarinet                                                        | tribunal                                          |
| flirtatious                                          | statistic                                       | skeleton                                             | classify                                                        | triangle                                          |
| flotation                                            | stupendous                                      | scholarly                                            | clinical                                                        | trickery                                          |
| flammable                                            | stiletto                                        | scallywag                                            | clavicle                                                        | tryptophan                                        |
| flowering                                            | stagnation                                      | scorpion                                             | clemency                                                        | tropical                                          |
| flavorful                                            | staccato                                        | skeptical                                            | clientele                                                       | trumpeter                                         |
| remove                                               | beneath                                         | detach                                               | forage                                                          | disease                                           |
| massive                                              | mammoth                                         | attach                                               | luggage                                                         | knickers                                          |
| forgive                                              | Sabbath                                         | enrich                                               | cabbage                                                         | appease                                           |
| behave                                               | Zenith                                          | bewitch                                              | baggage                                                         | amaze                                             |
| relieve                                              | uncouth                                         | retouch                                              | sewage                                                          | oppose                                            |
| alive                                                | Vermouth                                        | rematch                                              | message                                                         | demise                                            |
| olive                                                | Kenneth                                         | unlatch                                              | damage                                                          | baptize                                           |
| behoove                                              | Dartmouth                                       | dispatch                                             | rummage                                                         | arouse                                            |
| archive                                              | rebirth                                         | Norwich                                              | porridge                                                        | canoes                                            |
| concave                                              | forsooth                                        | research                                             | bandage                                                         | lashes                                            |

## Participant 8

| <b>List 1</b><br><i>Rep./Rhythm<br/>Treatment #1<br/>(no rhythm<br/>treatment<br/>needed)</i> | <b>List 2</b><br><i>Rep. Treatment<br/>Only</i> | <b>List 3</b><br><i>Rep./Rhythm<br/>Treatment #2<br/>(no rhythm<br/>treatment<br/>needed)</i> | <b>List 4</b><br><i>Exposure</i> | <b>List 5</b><br><i>Pre-Post<br/>No Treatment</i> |
|-----------------------------------------------------------------------------------------------|-------------------------------------------------|-----------------------------------------------------------------------------------------------|----------------------------------|---------------------------------------------------|
| l <u>a</u> gging                                                                              | s <u>o</u> upy                                  | <u>V</u> iking                                                                                | r <u>a</u> pid                   | t <u>i</u> dy                                     |
| l <u>a</u> dy                                                                                 | s <u>o</u> da                                   | <u>v</u> ia                                                                                   | r <u>u</u> dder                  | t <u>a</u> boo                                    |
| l <u>e</u> afty                                                                               | p <u>s</u> eudo                                 | <u>v</u> eda                                                                                  | r <u>o</u> ping                  | t <u>a</u> cky                                    |
| l <u>o</u> gic                                                                                | s <u>e</u> ason                                 | <u>v</u> iper                                                                                 | r <u>a</u> zor                   | t <u>a</u> co                                     |
| l <u>o</u> usy                                                                                | c <u>e</u> dar                                  | <u>V</u> icky                                                                                 | r <u>o</u> ofing                 | t <u>a</u> ffy                                    |
| l <u>o</u> pez                                                                                | s <u>u</u> pper                                 | <u>v</u> ichie                                                                                | r <u>o</u> sa                    | t <u>a</u> king                                   |
| l <u>o</u> oking                                                                              | s <u>a</u> ppy                                  | <u>v</u> icar                                                                                 | r <u>o</u> okie                  | t <u>a</u> ngo                                    |
| l <u>i</u> zzie                                                                               | s <u>i</u> cken                                 | <u>v</u> apor                                                                                 | r <u>o</u> cking                 | t <u>o</u> day                                    |
| l <u>o</u> aded                                                                               | s <u>u</u> ppose                                | <u>v</u> isa                                                                                  | r <u>u</u> pee                   | t <u>o</u> paz                                    |
| l <u>a</u> zy                                                                                 | s <u>o</u> fa                                   | <u>v</u> ision                                                                                | R <u>u</u> ssia                  | t <u>e</u> ddy                                    |
| c <u>a</u> n                                                                                  | b <u>a</u> be                                   | h <u>a</u> tch                                                                                | w <u>i</u> g                     | w <u>i</u> th                                     |
| g <u>e</u> ne                                                                                 | c <u>a</u> b                                    | w <u>i</u> tch                                                                                | c <u>o</u> g                     | k <u>e</u> ith                                    |
| f <u>u</u> n                                                                                  | ch <u>u</u> b                                   | c <u>a</u> tch                                                                                | f <u>i</u> g                     | p <u>a</u> th                                     |
| h <u>e</u> n                                                                                  | D <u>e</u> b                                    | w <u>a</u> tch                                                                                | w <u>a</u> g                     | y <u>o</u> uth                                    |
| d <u>a</u> n                                                                                  | d <u>a</u> b                                    | h <u>u</u> tch                                                                                | h <u>u</u> g                     | c <u>o</u> uth                                    |
| d <u>e</u> n                                                                                  | j <u>o</u> b                                    | p <u>a</u> tch                                                                                | f <u>o</u> g                     | f <u>a</u> ith                                    |
| ch <u>i</u> n                                                                                 | h <u>u</u> b                                    | p <u>i</u> tch                                                                                | p <u>e</u> g                     | f <u>o</u> urth                                   |
| co <u>i</u> n                                                                                 | f <u>i</u> b                                    | d <u>i</u> tch                                                                                | d <u>i</u> g                     | h <u>e</u> ath                                    |
| w <u>i</u> n                                                                                  | w <u>e</u> b                                    | d <u>u</u> tch                                                                                | d <u>o</u> g                     | s <u>h</u> eat <u>h</u>                           |
| z <u>o</u> ne                                                                                 | j <u>a</u> b                                    | p <u>e</u> ach                                                                                | j <u>u</u> g                     | d <u>e</u> ath                                    |



## Participant 9

| <b>List 1</b><br><i>Rep./Rhythm<br/>Treatment #1</i> | <b>List 2</b><br><i>Rep. Treatment<br/>Only</i> | <b>List 3</b><br><i>Rep./Rhythm<br/>Treatment #2</i> | <b>List 4</b><br><i>Exposure<br/>No Treatment</i> | <b>List 5</b><br><i>Pre-Post<br/>No Treatment</i> |
|------------------------------------------------------|-------------------------------------------------|------------------------------------------------------|---------------------------------------------------|---------------------------------------------------|
| flexible                                             | stethoscope                                     | scandalous                                           | clairvoyant                                       | tragedy                                           |
| flatulent                                            | standardize                                     | scavenger                                            | clamorous                                         | transitive                                        |
| flagellate                                           | staggering                                      | scurrilous                                           | clandestine                                       | transparent                                       |
| flamboyant                                           | stadium                                         | scarcity                                             | clarify                                           | treasury                                          |
| Florida                                              | stupefy                                         | schematic                                            | clarinet                                          | tribunal                                          |
| flirtatious                                          | statistic                                       | skeleton                                             | classify                                          | triangle                                          |
| flotation                                            | stupendous                                      | scholarly                                            | clinical                                          | trickery                                          |
| flammable                                            | stiletto                                        | scallywag                                            | clavicle                                          | tryptophan                                        |
| flowering                                            | stagnation                                      | scorpion                                             | clemency                                          | tropical                                          |
| flavorful                                            | staccato                                        | skeptical                                            | clientele                                         | trumpeter                                         |
| remove                                               | beneath                                         | detach                                               | forage                                            | disease                                           |
| massive                                              | mammoth                                         | attach                                               | luggage                                           | knickers                                          |
| forgive                                              | Sabbath                                         | enrich                                               | cabbage                                           | appease                                           |
| behave                                               | Zenith                                          | bewitch                                              | baggage                                           | amaze                                             |
| relieve                                              | uncouth                                         | retouch                                              | sewage                                            | oppose                                            |
| alive                                                | Vermouth                                        | rematch                                              | message                                           | demise                                            |
| olive                                                | Kenneth                                         | unlatch                                              | damage                                            | baptize                                           |
| behoove                                              | Dartmouth                                       | dispatch                                             | rummage                                           | arouse                                            |
| archive                                              | rebirth                                         | Norwich                                              | porridge                                          | canoes                                            |
| concave                                              | forsooth                                        | research                                             | bandage                                           | lashes                                            |

## Participant 10

| <b>List 1</b><br><i>Rep./Rhythm<br/>Treatment 1</i> | <b>List 2</b><br><i>Rep. Treatment<br/>Only</i> | <b>List 3</b><br><i>Rep./Rhythm<br/>Treatment #2</i> | <b>List 4</b><br><i>Exposure<br/>No Treatment</i> | <b>List 5</b><br><i>Pre-Post<br/>No Treatment</i> |
|-----------------------------------------------------|-------------------------------------------------|------------------------------------------------------|---------------------------------------------------|---------------------------------------------------|
| scratchiness                                        | spreadeagle                                     | splendorous                                          | squandering                                       | strangulate                                       |
| screenwriter                                        | springiness                                     | splattering                                          | squaredances                                      | strategic                                         |
| screwdriver                                         | sprightliness                                   | splintering                                          | squiggling                                        | Stravinsky                                        |
| scriptural                                          | sclerosis                                       | splotchiness                                         | squeamishness                                     | strategize                                        |
| scrupulous                                          | sclerotic                                       | splutterer                                           | squishiness                                       | stratosphere                                      |
| scrumptious                                         | sprucest                                        | splashes                                             | squeegee                                          | stringent                                         |
| scrimmage                                           | sclera                                          | splitshift                                           | squalor                                           | structure                                         |
| screeches                                           | sprinkler                                       | splinter                                             | squishy                                           | stretcher                                         |
| scrawny                                             | sprayer                                         | splendid                                             | squirmy                                           | streusel                                          |
| scrabble                                            | sprawling                                       | splashboard                                          | squadron                                          | strangle                                          |
| egregious                                           | equation                                        | angrily                                              | ungracious                                        | achievement                                       |
| astringent                                          | ambrosia                                        | Anglicize                                            | ablation                                          | actual                                            |
| angina                                              | abrasion                                        | angular                                              | excretion                                         | amateur                                           |
| estrogen                                            | inclusion                                       | Englishmen                                           | absorption                                        | anchovy                                           |
| undulate                                            | aversion                                        | inglenook                                            | official                                          | essential                                         |
| drudgery                                            | treasury                                        | lingering                                            | crustacean                                        | patchouli                                         |
| vigilant                                            | measurement                                     | sanguinely                                           | crescendo                                         | hatchery                                          |
| vegetable                                           | luxury                                          | congregate                                           | sashimi                                           | kitchenette                                       |
| scheduling                                          | visual                                          | fungicide                                            | fruition                                          | flatulence                                        |
| legible                                             | casual                                          | bungalow                                             | tenacious                                         | petulant                                          |
