# Supplementary material
Source: publisher figshare collection journal article supplement (https://asha.figshare.com/articles/dataset/_/6170201)
Supplement: Supplementary file 2 [file 1]

## Online Supplemental Material

Table 1. Interrater reliability.

| Participant | Interrater agreement |
|-------------|----------------------|
| P1          | 85%                  |
| P2          | 83%                  |
| P3          | 90%                  |
| P4          | 90%                  |
| P5          | 85%                  |
| P6          | 97%                  |
| P7          | 93%                  |
| P8          | 94%                  |
| P9          | 93%                  |
| P10         | 96%                  |
| Range       | 83% to 97%           |
| Average     | 91%                  |
