# Supplementary material
Source: publisher figshare collection journal article supplement (https://asha.figshare.com/articles/dataset/_/6170201)
Supplement: Supplementary file 3 [file 1]

## Online Supplemental Material

Table 2. Effect sizes: *d* index values for the treated lists.

| Participant | Repetition<br>List 1 | Repetition<br>List 2                                                                                    | Repetition<br>List 3 | Repetition<br>List 4 | Rate/Rhythm<br>List 1 | Rate/Rhythm<br>List 3 |
|-------------|----------------------|---------------------------------------------------------------------------------------------------------|----------------------|----------------------|-----------------------|-----------------------|
| P1          | 7.58                 | 3.39 <sup>1</sup><br>2.21 <sup>2</sup><br>2.39 <sup>3</sup><br>1.15 <sup>4</sup><br>7.61 <sup>cum</sup> | 16.47                | na                   | 2.94                  | 1.17                  |
| P2          | 12.89                | 6.71 <sup>1</sup><br>1.53 <sup>2</sup><br>.15 <sup>3</sup><br>17.93 <sup>cum</sup>                      | 4.37                 | na                   | na                    | 1.85                  |
| P3          | 12.08                | 8.11 <sup>1</sup><br>1.25 <sup>2</sup><br>11.31 <sup>cum</sup>                                          | 6.78                 | na                   | na                    | na                    |
| P4          | 3.95                 | 5.01 <sup>1</sup><br>1.45 <sup>2</sup><br>6.91 <sup>cum</sup>                                           | 2.3                  | 4.05                 | 5.47                  | 1.19                  |
| P5          | 7.42                 | 14.8 <sup>1</sup><br>1.39 <sup>2</sup><br>15.61 <sup>cum</sup>                                          | 5.3                  | 5.9                  | 2.01                  | na                    |
| P6          | 1.83                 | 2.49 <sup>1</sup><br>.80 <sup>2</sup><br>4.39 <sup>cum</sup>                                            | na                   | na                   | .34                   | na                    |
| P7          | 9.17                 | 6.69 <sup>1</sup><br>1.49 <sup>2</sup><br>9.84 <sup>cum</sup>                                           | 11.06                | 3.43                 | 1.97                  | 6.45                  |
| P8          | 11.7                 | 3.29 <sup>1</sup><br>.87 <sup>2</sup><br>9.18 <sup>cum</sup>                                            | 3.2                  | na                   | na                    | na                    |
| P9          | 7.38                 | 8.16 <sup>1</sup><br>.75 <sup>2</sup><br>3.73 <sup>3</sup><br>.76 <sup>4</sup><br>23.51 <sup>cum</sup>  | 3.75                 | na                   | 3.8                   | 2.12                  |

|     |      |                     |      |    |     |     |
|-----|------|---------------------|------|----|-----|-----|
| P10 | 1.31 | 1.21 <sup>1</sup>   | 1.31 | na | .34 | .34 |
|     |      | .63 <sup>2</sup>    |      |    |     |     |
|     |      | .51 <sup>3</sup>    |      |    |     |     |
|     |      | .57 <sup>4</sup>    |      |    |     |     |
|     |      | 1.72 <sup>cum</sup> |      |    |     |     |

*Note.* 1 = end of first treatment phase; 2 = end of second treatment phase; 3 = end of third treatment phase; 4 = end of fourth treatment phase; cum = cumulative (baseline compared to end of last treatment phase).
